# Supplementary material for: Keystone Taxa Lactiplantibacillus and Lacticaseibacillus Directly Improve the Ensiling Performance and Microflora Profile in Co-Ensiling Cabbage Byproduct and Rice Straw
Source: MDPI journal article supplement (doi:10.3390/microorganisms9051099), 2021-05-20
Supplement: s1 [file s1]

## Supplementary data list

**Spreadsheet 1** The bacterial phenotypes annotation using DacDive database and Bergey' s Manual of Systematic Bacteriology. Only taxa of RA > 5% was annotated.

**Spreadsheet 2** The fungal trophic modes and ecological guilds annotation using FUNGuild.

**Supplementary Figure S1.** Effect of *Lactobacillus plantarum* additive on the microbial community dynamics at the phylum level of cabbage and rice straw silage. (A) The relative abundance of bacterial taxa; (B) The relative abundance of fungal taxa; Taxa with < 5% of reads were combined as 'others'; CKGP: the control group; LPGP: the inoculation group. The numbers following the CKGP and LPGP indicate the sampling time (day).

**Supplementary Figure S2.** Effect of *Lactobacillus plantarum* additive on the microbial community dynamics at the species level of cabbage and rice straw silage. (A) The relative abundance of bacterial taxa; (B) The relative abundance of fungal taxa; Taxa with < 5% of reads were combined as 'others'; CKGP: the control group; LPGP: the inoculation group. The numbers following the CKGP and LPGP indicate the sampling time (day).

**Supplementary Table S1** Topological characteristics of co-occurrence network.

## 1. Supplementary Figures

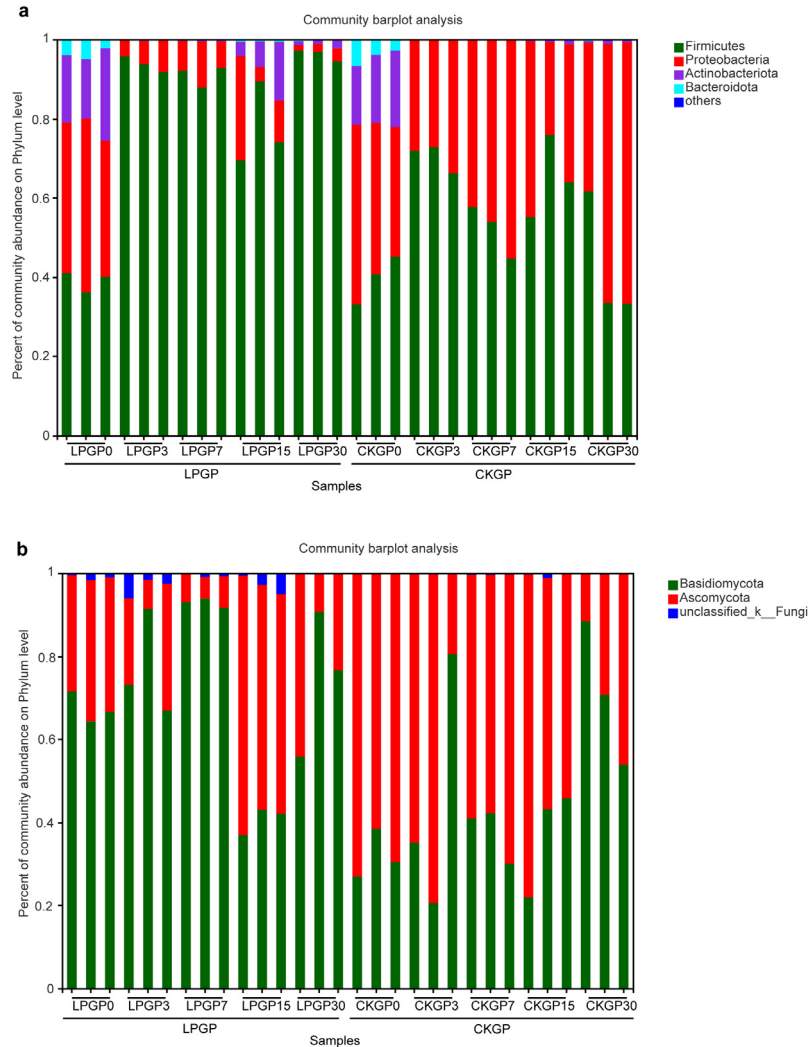

**Supplementary Figure S1.** Effect of *Lactobacillus plantarum* additive on the microbial community dynamics at the phylum level of cabbage and rice straw silage. (A) The relative abundance of bacterial taxa; (B) The relative abundance of fungal taxa; Taxa with < 5% of reads were combined as ‘others’; CKGP: the control group; LPGP: the inoculation group. The numbers following the CKGP and LPGP indicate the sampling time (day).

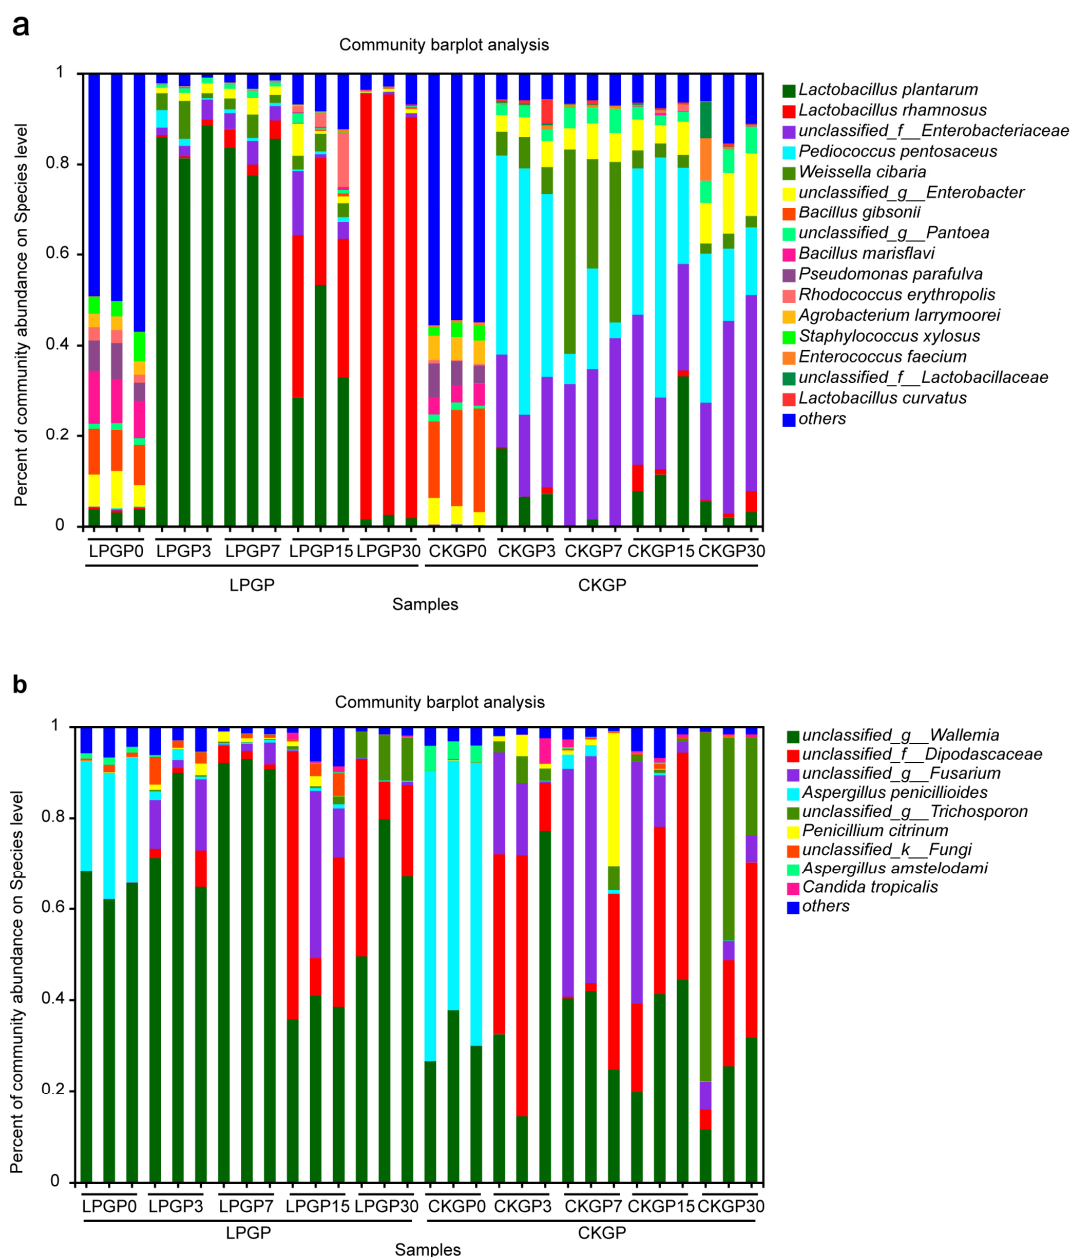

**Supplementary Figure S2.** Effect of *Lactobacillus plantarum* additive on the microbial community dynamics at the species level of cabbage and rice straw silage. (A) The relative abundance of bacterial taxa; (B) The relative abundance of fungal taxa; Taxa with < 5% of reads were combined as ‘others’; CKGP: the control group; LPGP: the inoculation group. The numbers following the CKGP and LPGP indicate the sampling time (day).

## 2. Supplementary Tables

**Supplementary Table S1** Topological characteristics of co-occurrence network.

| Parameter               | Group |       |
|-------------------------|-------|-------|
|                         | CKGP  | LPGP  |
| Total nodes             | 31    | 37    |
| Total edges             | 100   | 145   |
| Average degree          | 6.452 | 7.838 |
| Average weighted degree | 2.996 | 6.372 |
| Network diameter        | 6     | 10    |
| Graph density           | 0.215 | 0.218 |
| Modularity              | 0.649 | 0.312 |
| Connected components    | 1     | 1     |
| Clustering coefficient  | 0.621 | 0.632 |
| Average path length     | 2.634 | 3.239 |

CKGP: the control group; LPGP: the inoculation group.
