# Supplementary material for: Keystone Taxa Lactiplantibacillus and Lacticaseibacillus Directly Improve the Ensiling Performance and Microflora Profile in Co-Ensiling Cabbage Byproduct and Rice Straw
Source: Microorganisms. 2021 May 20;9(5):1099. doi: 10.3390/microorganisms9051099 (PMC8161039; doi:10.3390/microorganisms9051099)
Supplement: Supplementary file 1 [file microorganisms-09-01099-s001.zip › Excel1 bacterial phenotype annotation.xlsx]

## Sheet: Day3-30
The bacterial phenotypes annotation using DacDive database and Bergey’ s Manual of Systematic Bacteriology.
Taxonomic classification						Phenotype				Relative abundance								References
Phylum	Class	Order	Famliy	Genus	Species	Obligately aerobic	Spore-forming	Potential pathogen	Lactic acid bacteria	CKGP3	CKGP7	CKGP15	CKGP30	FJGP3	FJGP7	FJGP15	FJGP30
Firmicutes	Bacilli	Lactobacillales	Lactobacillaceae	Lactobacillus	Lactobacillus plantarum	FALSE	FALSE	FALSE	TRUE	0.102467	0.00504532	0.173978	0.0348238	0.851813	0.821873	0.382387	0.0193756	Brenner, D.J., Krieg, N.R., Staley, J.T., Garrity, G.M., Boone, D.R., Vos, P.D., et al. (2005). Bergey’s Manual of Systematic Bacteriology. Bergey’s Manual® of Systematic Bacteriology.
Firmicutes	Bacilli	Lactobacillales	Lactobacillaceae	Lactobacillus	Lactobacillus rhamnosus	FALSE	FALSE	FALSE	TRUE	0.00573011	1.00705e-05	0.0280463	0.0192749	0.00773414	0.0353676	0.313595	0.91721	Collins MD, Phillips BA, Zanoni P. Deoxyribonucleic acid homology studies of Lactobacillus casei, Lactobacillus paracasei sp. nov., subsp. paracasei and subsp. tolerans, and Lactobacillus rhamnosus sp. nov., comb. nov. Int. J. Syst. Bacteriol. 1989; 39:105-108
Proteobacteria	Gammaproteobacteria	Enterobacterales	Enterobacteriaceae	unclassified_Enterobacteriaceae	unclassified_f__Enterobacteriaceae	FALSE	FALSE	TRUE	FALSE	0.211067	0.354179	0.24138	0.358499	0.0279557	0.0400302	0.0627593	0.00544814	Brenner, D.J., Krieg, N.R., Staley, J.T., Garrity, G.M., Boone, D.R., Vos, P.D., et al. (2005). Bergey’s Manual of Systematic Bacteriology. Bergey’s Manual® of Systematic Bacteriology.
Firmicutes	Bacilli	Lactobacillales	Lactobacillaceae	Pediococcus	Pediococcus pentosaceus	FALSE	FALSE	FALSE	TRUE	0.461823	0.107251	0.35573	0.211067	0.0191641	0.0072709	0.00701913	5.03525e-05	Mees RH. Onderzoekingen over de Biersarcina. Thesis. Technical University Delft, Delft/Holland, 1934.
Firmicutes	Bacilli	Lactobacillales	Leuconostocaceae	Weissella	Weissella cibaria	FALSE	FALSE	TRUE	TRUE	0.0601511	0.349406	0.03286	0.0268983	0.0439376	0.0307452	0.0335952	0.000986908	Bjorkroth KJ, Schillinger U, Geisen R, Weiss N, Hoste B, Holzapfel WH, Korkeala HJ, Vandamme P. Taxonomic study of Weissella confusa and description of Weissella cibaria sp. nov., detected in food and clinical samples. Int J Syst Evol Microbiol 2002; 52:141-148.
Proteobacteria	Gammaproteobacteria	Enterobacterales	Enterobacteriaceae	Enterobacter	unclassified_g__Enterobacter	FALSE	FALSE	TRUE	FALSE	0.0460826	0.0631219	0.0598691	0.121913	0.0170493	0.0256193	0.0310473	0.00573011	Vila C , Carvalho B F . Silage fermentation—updates focusing on the performance of micro‐organisms[J]. Journal of Applied Microbiology, 2019, 128(4).
Firmicutes	Bacilli	Bacillales	Bacillaceae	Bacillus	Bacillus gibsonii	TRUE	TRUE	-	-	4.0282e-05	0.000130916	0.000352467	0.000553877	7.04935e-05	0.000231621	0.00354481	0.00249748	Nielsen P, et al. Phenetic diversity of alkaliphilic Bacillus strains: proposal for nine new species. Microbiology 141: 1745-1761, 1995.
Proteobacteria	Gammaproteobacteria	Enterobacterales	Erwiniaceae	Pantoea	unclassified_g__Pantoea	-	-	-	-	0.0246123	0.0440886	0.0243202	0.0529909	0.00966767	0.0113998	0.0106042	0.00153072
Firmicutes	Bacilli	Bacillales	Bacillaceae	Bacillus	Bacillus marisflavi	TRUE	TRUE	FALSE	FALSE	0.000352467	9.06344e-05	0.00274924	0.00060423	0.000443102	0.000130916	0.00345418	0.00221551	Yoon JH, Kim IG, Kang KH, Oh TK, Park YH. Bacillus marisflavi sp. nov. and Bacillus aquimaris sp. nov., isolated from sea water of a tidal flat of the Yellow Sea in Korea. Int J Syst Evol Microbiol 2003; 53:1297-1303.
Proteobacteria	Gammaproteobacteria	Pseudomonadales	Pseudomonadaceae	Pseudomonas	Pseudomonas parafulva	-	-	-	-	3.02115e-05	5.03525e-05	6.0423e-05	9.06344e-05	0.00021148	0.000241692	0.000503525	0.000140987
Actinobacteriota	Actinobacteria	Corynebacteriales	Nocardiaceae	Rhodococcus	Rhodococcus erythropolis	-	-	TRUE	-	0	1.00705e-05	0.00529708	0.000292044	0.00127895	0.00229607	0.0551662	0.000251762	Goodfellow M, Alderson G. The actinomycete genus Rhodococcus: a home for the "rhodochrous" complex. Journal of General. Microbiology 1977; 100:99-122.
Proteobacteria	Alphaproteobacteria	Rhizobiales	Rhizobiaceae	Allorhizobium-Neorhizobium-Pararhizobium-Rhizobium	Agrobacterium larrymoorei	-	-	-	-	8.05639e-05	0.000110775	6.0423e-05	0.000181269	0.000161128	0.000181269	0.000483384	4.0282e-05
others	others	others	others	others	others	-	-	-	-	0.0875629	0.0765055	0.0752971	0.17281	0.0205136	0.0246123	0.0958409	0.0445217
Note: Only taxa of RA > 5% was annotated.

## Sheet: Day0
The bacterial phenotypes annotation using DacDive database and Bergey’ s Manual of Systematic Bacteriology.
Taxonomic classification						Phenotype				Relative abundance		References
Phylum	Class	Order	Famliy	Genus	Species	Obligately aerobic	Spore-forming	Potential pathogen	Lactic acid bacteria	CKGP0	LPGP0
Firmicutes	Bacilli	Bacillales	Bacillaceae	Bacillus	Bacillus gibsonii	TRUE	TRUE	FALSE	FALSE	0.204935	0.0946224	Nielsen P, et al. Phenetic diversity of alkaliphilic Bacillus strains: proposal for nine new species. Microbiology 141: 1745-1761, 1995.
Firmicutes	Bacilli	Bacillales	Bacillaceae	Bacillus	Bacillus marisflavi	TRUE	TRUE	FALSE	FALSE	0.0421349	0.0991239	Yoon JH, Kim IG, Kang KH, Oh TK, Park YH. Bacillus marisflavi sp. nov. and Bacillus aquimaris sp. nov., isolated from sea water of a tidal flat of the Yellow Sea in Korea. Int J Syst Evol Microbiol 2003; 53:1297-1303.
Proteobacteria	Gammaproteobacteria	Pseudomonadales	Pseudomonadaceae	Pseudomonas	Pseudomonas parafulva	TRUE	FALSE	TRUE	FALSE	0.0551863	0.0615509	Brenner, D.J., Krieg, N.R., Staley, J.T., Garrity, G.M., Boone, D.R., Vos, P.D., et al. (2005). Bergey’s Manual of Systematic Bacteriology. Bergey’s Manual® of Systematic Bacteriology.
Proteobacteria	Gammaproteobacteria	Enterobacterales	Enterobacteriaceae	Enterobacter	unclassified_g__Enterobacter	FALSE	FALSE	TRUE	FALSE	0.0422054	0.0667069	Brenner, D.J., Krieg, N.R., Staley, J.T., Garrity, G.M., Boone, D.R., Vos, P.D., et al. (2005). Bergey’s Manual of Systematic Bacteriology. Bergey’s Manual® of Systematic Bacteriology.
Proteobacteria	Alphaproteobacteria	Rhizobiales	Rhizobiaceae	Allorhizobium-Neorhizobium-Pararhizobium-Rhizobium	Agrobacterium larrymoorei	TRUE	FALSE	TRUE	FALSE	0.0514703	0.0297382	Bouzar H, Jones JB. Agrobacterium larrymoorei sp. nov., a pathogen isolated from aerial tumours of Ficus benjamina. Int J Syst Evol Microbiol 2001; 51:1023-1026.
Actinobacteriota	Actinobacteria	Micrococcales	Microbacteriaceae	Curtobacterium	unclassified_g__Curtobacterium	-	-	-	-	0.0399496	0.0345619
Firmicutes	Bacilli	Staphylococcales	Staphylococcaceae	Staphylococcus	Staphylococcus xylosus	-	-	-	-	0.0283283	0.0448036
Proteobacteria	Alphaproteobacteria	Rhizobiales	Beijerinckiaceae	Methylobacterium-Methylorubrum	Methylobacterium brachiatum	-	-	-	-	0.0370796	0.0355388
Actinobacteriota	Actinobacteria	Micrococcales	Microbacteriaceae	Curtobacterium	Curtobacterium citreum	-	-	-	-	0.0297583	0.0289225
Firmicutes	Bacilli	Paenibacillales	Paenibacillaceae	Paenibacillus	Paenibacillus xylanexedens	-	-	-	-	0.0259416	0.030141
Proteobacteria	Alphaproteobacteria	Sphingomonadales	Sphingomonadaceae	Sphingomonas	unclassified_g__Sphingomonas	-	-	-	-	0.0269285	0.0260222
Proteobacteria	Gammaproteobacteria	Xanthomonadales	Xanthomonadaceae	Stenotrophomonas	unclassified_g__Stenotrophomonas	-	-	-	-	0.0232729	0.0287815
Firmicutes	Bacilli	Bacillales	Bacillaceae	Bacillus	Bacillus cellulasensis	-	-	-	-	0.0262941	0.0230916
Firmicutes	Bacilli	Staphylococcales	Staphylococcaceae	Staphylococcus	Staphylococcus sciuri	-	-	-	-	0.0151057	0.0234642
Firmicutes	Bacilli	Lactobacillales	Lactobacillaceae	Lactobacillus	Lactobacillus plantarum	-	-	-	TRUE	5.03525e-05	0.0347231
Proteobacteria	Alphaproteobacteria	Rhizobiales	Beijerinckiaceae	Methylobacterium-Methylorubrum	Methylorubrum extorquens	-	-	-	-	0.0196375	0.0139879
Proteobacteria	Alphaproteobacteria	Rhizobiales	Rhizobiaceae	Aureimonas	uncultured bacterium	-	-	-	-	0.0229204	0.00908359
Bacteroidota	Bacteroidia	Sphingobacteriales	Sphingobacteriaceae	Sphingobacterium	Sphingobacterium multivorum	-	-	-	-	0.0169587	0.0150252
Proteobacteria	Gammaproteobacteria	Xanthomonadales	Xanthomonadaceae	Xanthomonas	unclassified_g__Xanthomonas	-	-	-	-	0.0192548	0.0103726
Actinobacteriota	Actinobacteria	Corynebacteriales	Nocardiaceae	Rhodococcus	Rhodococcus erythropolis	-	-	-	-	0.00405841	0.025136
Proteobacteria	Alphaproteobacteria	Rhizobiales	Beijerinckiaceae	Methylobacterium-Methylorubrum	unclassified_g__Methylobacterium-Methylorubrum	-	-	-	-	0.0113494	0.0159114
Proteobacteria	Gammaproteobacteria	Enterobacterales	Erwiniaceae	Pantoea	unclassified_g__Pantoea	-	-	-	-	0.0125076	0.0136354
Actinobacteriota	Actinobacteria	Micrococcales	Intrasporangiaceae	Lapillicoccus	unclassified_g__Lapillicoccus	-	-	-	-	0.0120242	0.0108459
Actinobacteriota	Actinobacteria	Micromonosporales	Micromonosporaceae	Micromonospora	unclassified_g__Micromonospora	-	-	-	-	0.0144109	0.00695871
Firmicutes	Bacilli	Exiguobacterales	Exiguobacteraceae	Exiguobacterium	Exiguobacterium indicum	-	-	-	-	0.011289	0.00656596
others	others	others	others	others	others	-	-	-	-	0.206949	0.210685
Note: Only taxa of RA > 5% was annotated.CKGP: the control group; LPGP: the inoculation group. The numbers following the CKGP and LPGP indicate the sampling time (day).
