# Supplementary material for: Keystone Taxa Lactiplantibacillus and Lacticaseibacillus Directly Improve the Ensiling Performance and Microflora Profile in Co-Ensiling Cabbage Byproduct and Rice Straw
Source: Microorganisms. 2021 May 20;9(5):1099. doi: 10.3390/microorganisms9051099 (PMC8161039; doi:10.3390/microorganisms9051099)
Supplement: Supplementary file 1 [file microorganisms-09-01099-s001.zip › Excel2 fungal funguild annotation.xls]

## Sheet: sheet1
The fungal trophic modes and ecological guilds annotation using FUNGuild.
						Relative abundance										Trophic Mode	Guild	Growth Morphology	Trait	Notes	Citation/Source
Taxonomy p	Taxonomy c	Taxonomy o	Taxonomy f	Taxonomy g	Taxonomy s	CKGP0	CKGP3	CKGP7	CKGP15	CKGP30	FJGP0	FJGP3	FJGP7	FJGP15	FJGP30
Basidiomycota	Wallemiomycetes	Wallemiales	Wallemiaceae	Wallemia	unclassified_g__Wallemia	0.15418	0.180963	0.173362	0.164133	0.107673	0.321209	0.379298	0.459283	0.192363	0.324104	Saprotroph	Undefined Saprotroph	-	-	-	Tedersoo L, et al. 2014. Science 346:1256688 (doi:10.1126/science.1256688)
Basidiomycota	Wallemiomycetes	Wallemiales	Wallemiaceae	Wallemia	unclassified_g__Wallemia	0.0745566	0.104596	0.0830619	0.0908433	0.0560984	0.145675	0.187658	0.221136	0.100615	0.154723	Saprotroph	Undefined Saprotroph	-	-	-	Tedersoo L, et al. 2014. Science 346:1256688 (doi:10.1126/science.1256688)
Basidiomycota	Wallemiomycetes	Wallemiales	Wallemiaceae	Wallemia	unclassified_g__Wallemia	0.0691278	0.106406	0.0821571	0.0821571	0.0479551	0.150923	0.1654	0.203945	0.0732899	0.146037	Saprotroph	Undefined Saprotroph	-	-	-	Tedersoo L, et al. 2014. Science 346:1256688 (doi:10.1126/science.1256688)
Ascomycota	Sordariomycetes	Hypocreales	Nectriaceae	Fusarium	unclassified_g__Fusarium	0.000180963	0.128303	0.333333	0.223127	0.0548317	0.000361925	0.0933768	0.0217155	0.159609	0.00343829	Pathotroph-Saprotroph-Symbiotroph	Animal Pathogen-Endophyte-Lichen Parasite-Plant Pathogen-Soil Saprotroph-Wood Saprotroph	Microfungus	-	Likely opportunistic human pathogen (Irinyi et al. 2015)	Duncan CG, Eslyn WE. 1966. Mycologia 58:642-664; Seehann G, et al. 1975. List of Fungi in Soft-Rot Tissue Tests. Institute fur Holzbiologie und Holzschutz, Bundesforschungsanstalt fur Forst - und Holzwirtshaft, Hamburg - Lohbrugge, Germany; Costa IPMW, et al. 2012. Mycotaxon 119:26; Tedersoo L, et al. 2014. Science 346:1256688; Irinyi L, et al. 2015. Medical Mycology 53:313-337; Schroers et al. 2…
Ascomycota	Saccharomycetes	Saccharomycetales	Dipodascaceae	unclassified_Dipodascaceae	unclassified_Dipodascaceae	0	0.206117	0.0790807	0.201231	0.121969	0	0.0215346	0.0112197	0.18802	0.132827	Saprotroph	Undefined Saprotroph	Yeast	-	-	Sterkenburg E, et al. 2015. New Phytologist 207:1145-1158
Basidiomycota	Tremellomycetes	Trichosporonales	Trichosporonaceae	Trichosporon	unclassified_g__Trichosporon	0	0.0367354	0.0182772	0.00941006	0.47557	0	0.00217155	0.00217155	0.00959102	0.0834238	Pathotroph	Animal Pathogen	-	-	Likely opportunistic human pathogen (Irinyi et al. 2015)	Irinyi L, et al. 2015. Medical Mycology 53:313-337; http://www.cdc.gov
Ascomycota	Eurotiomycetes	Eurotiales	Aspergillaceae	Aspergillus	Aspergillus penicillioides	0.384184	0.000180963	0.019182	0.000904814	0.000361925	0.188744	0.0123055	0.00325733	0.00235252	0.000723851	Saprotroph	Undefined Saprotroph	Microfungus	-	-	Sterkenburg E, et al. 2015. New Phytologist 207:1145-1158
Ascomycota	Saccharomycetes	Saccharomycetales	Dipodascaceae	unclassified_Dipodascaceae	unclassified_Dipodascaceae	0	0.127941	0.0481361	0.118712	0.0801665	0	0.0126674	0.00832429	0.115816	0.082338	Saprotroph	Undefined Saprotroph	Yeast	-	-	Sterkenburg E, et al. 2015. New Phytologist 207:1145-1158
Ascomycota	Eurotiomycetes	Eurotiales	Aspergillaceae	Aspergillus	Aspergillus penicillioides	0.201592	0.000180963	0.000723851	0.000723851	0	0.0705755	0.00217155	0.000361925	0.0014477	0.000180963	Saprotroph	Undefined Saprotroph	Microfungus	-	-	Sterkenburg E, et al. 2015. New Phytologist 207:1145-1158
Basidiomycota	Wallemiomycetes	Wallemiales	Wallemiaceae	Wallemia	unclassified_g__Wallemia	0.0137532	0.0184582	0.0155628	0.0108578	0.0159247	0.0309446	0.0159247	0.0276873	0.0141151	0.0237061	Saprotroph	Undefined Saprotroph	-	-	-	Tedersoo L, et al. 2014. Science 346:1256688 (doi:10.1126/science.1256688)
Ascomycota	Eurotiomycetes	Eurotiales	Aspergillaceae	Penicillium	Penicillium citrinum	0.000542888	0.0226203	0.104777	0.000361925	0.000180963	0.000723851	0.0137532	0.0106768	0.0112197	0	Saprotroph	Undefined Saprotroph	Microfungus	-	-	Sterkenburg E, et al. 2015. New Phytologist 207:1145-1158
Ascomycota	Saccharomycetes	Saccharomycetales	Dipodascaceae	unclassified_Dipodascaceae	unclassified_Dipodascaceae	0	0.024249	0.00832429	0.0332971	0.0184582	0	0.00325733	0.00271444	0.028954	0.0235252	Saprotroph	Undefined Saprotroph	Yeast	-	-	Sterkenburg E, et al. 2015. New Phytologist 207:1145-1158
unclassified_k__Fungi	unclassified_k__Fungi	unclassified_k__Fungi	unclassified_k__Fungi	unclassified_k__Fungi	unclassified_k__Fungi	0.00126674	0.000904814	0.00380022	0.00579081	0.00180963	0.0104958	0.0336591	0.00597177	0.0278683	0.000723851	Unknown	Unknown	-	-	Unassigned	-
Ascomycota	Eurotiomycetes	Eurotiales	Aspergillaceae	Aspergillus	Aspergillus amstelodami	0.0439739	0.000180963	0.00162866	0.000904814	0.000180963	0.0135722	0.00199059	0.000723851	0.00126674	0.000361925	Saprotroph	Undefined Saprotroph	Microfungus	-	-	Sterkenburg E, et al. 2015. New Phytologist 207:1145-1158
Basidiomycota	Wallemiomycetes	Wallemiales	Wallemiaceae	Wallemia	Wallemia canadensis	0.00343829	0.00325733	0.00307637	0.00271444	0.00524792	0.0153818	0.0112197	0.00542888	0.00398118	0.00488599	Saprotroph	Undefined Saprotroph	-	-	-	Tedersoo L, et al. 2014. Science 346:1256688 (doi:10.1126/science.1256688)
Ascomycota	Saccharomycetes	Saccharomycetales	unclassified_Saccharomycetales	unclassified_Saccharomycetales	unclassified_Saccharomycetales	0.00108578	0.0014477	0.00235252	0.00904814	0	0.00904814	0.00597177	0.000904814	0.019544	0.000542888	Saprotroph	Undefined Saprotroph	Yeast	-	-	Sterkenburg E, et al. 2015. New Phytologist 207:1145-1158
Ascomycota	Saccharomycetes	Saccharomycetales	Saccharomycetales_fam_Incertae_sedis	Candida	Candida tropicalis	0	0.0180963	0.00597177	0.00723851	0.00325733	0	0.000180963	0.000180963	0.00995295	0.00162866	Saprotroph	Undefined Saprotroph	Yeast	-	-	Sterkenburg E, et al. 2015. New Phytologist 207:1145-1158
Basidiomycota	Wallemiomycetes	Wallemiales	Wallemiaceae	Wallemia	unclassified_g__Wallemia	0.00199059	0.00253348	0.00180963	0.00325733	0.000723851	0.00307637	0.00380022	0.00651466	0.00271444	0.00560984	Saprotroph	Undefined Saprotroph	-	-	-	Tedersoo L, et al. 2014. Science 346:1256688 (doi:10.1126/science.1256688)
Ascomycota	Eurotiomycetes	Eurotiales	Aspergillaceae	Aspergillus	unclassified_g__Aspergillus	0.0133912	0.000180963	0.000904814	0.00235252	0.00126674	0.00723851	0.000904814	0.00108578	0.00361925	0.000361925	Saprotroph	Undefined Saprotroph	Microfungus	-	-	Sterkenburg E, et al. 2015. New Phytologist 207:1145-1158
Ascomycota	Sordariomycetes	Trichosphaeriales	Trichosphaeriaceae	Nigrospora	Nigrospora oryzae	0.000361925	0.00217155	0.000723851	0.00325733	0.00108578	0.0014477	0.0106768	0.00162866	0.00669562	0.000361925	Saprotroph	Undefined Saprotroph	-	-	-	Tedersoo L, et al. 2014. Science 346:1256688
Ascomycota	Eurotiomycetes	Eurotiales	Aspergillaceae	Aspergillus	Aspergillus cibarius	0.0135722	0.000904814	0.000723851	0.0014477	0.000361925	0.00741947	0.00162866	0.000542888	0.00126674	0.000180963	Saprotroph	Undefined Saprotroph	Microfungus	-	-	Sterkenburg E, et al. 2015. New Phytologist 207:1145-1158
Ascomycota	Sordariomycetes	Hypocreales	Hypocreales_fam_Incertae_sedis	Sarocladium	Sarocladium kiliense	0	0.00832429	0.00488599	0.00416214	0.00162866	0	0.00217155	0.000361925	0.00271444	0	Saprotroph	Undefined Saprotroph	-	-	-	Tedersoo L, et al. 2014. Science 346:1256688
Ascomycota	Eurotiomycetes	Eurotiales	Aspergillaceae	Aspergillus	Aspergillus penicillioides	0.0130293	0	0.000723851	0.000180963	0.000180963	0.00416214	0.00126674	0.000180963	0.000904814	0	Saprotroph	Undefined Saprotroph	Microfungus	-	-	Sterkenburg E, et al. 2015. New Phytologist 207:1145-1158
Ascomycota	Dothideomycetes	Capnodiales	Cladosporiaceae	Cladosporium	Cladosporium delicatulum	0.000180963	0.000904814	0.00126674	0.00452407	0.00108578	0.000904814	0.00542888	0.000904814	0.00434311	0.000723851	Pathotroph-Saprotroph-Symbiotroph	Animal Pathogen-Endophyte-Lichen Parasite-Plant Pathogen-Wood Saprotroph	Microfungus	-	-	Seehann G, et al. 1975. List of Fungi in Soft-Rot Tissue Tests. Institute fur Holzbiologie und Holzschutz, Bundesforschungsanstalt fur Forst - und Holzwirtshaft, Hamburg - Lohbrugge, Germany; Lawrey JD, Diederich P. 2016. URL: http://www.lichenicolous.net [24 May 2017]; http://www.apsnet.org/publications/commonnames/Pages/default.aspx
Ascomycota	Sordariomycetes	Hypocreales	Hypocreales_fam_Incertae_sedis	Acremonium	Acremonium sclerotigenum	0	0	0.000180963	0.00868621	0.000180963	0	0.00108578	0	0.000542888	0.000723851	Pathogen-Saprotroph-Symbiotroph	Animal Pathogen-Endophyte-Fungal Parasite-Plant Pathogen-Wood Saprotroph	Microfungus	Soft Rot	Endophyte detection method-culture (Hanada et al. 2010, Del Olmo-Ruiz & Arnold 2014); Likely opportunistic human pathogen (Irinyi et al. 2015)	Duncan CG, Eslyn WE. 1966. Mycologia 58:642-64; Nilsson T. 1973. Studies on wood degradation and cellulolytic activity of microfungi. No. 104; Worrall JJ, et al. 1997. Mycologia 89: 199-219; Hanada RE, et al. 2010. Fungal Biology 114:901-910; Del Olmo-Ruiz M, Arnold AE. 2014. Mycologia 106:8-21; Tedersoo L, et al. 2014. Science 346:1256688; Irinyi L, et al. 2015. Medical Mycology 53:313-337
Basidiomycota	Microbotryomycetes	Sporidiobolales	Sporidiobolaceae	Sporidiobolus	Sporidiobolus pararoseus	0.000361925	0.000542888	0.000180963	0.00108578	0.000180963	0.00126674	0.00217155	0.000723851	0.00235252	0	Pathotroph-Saprotroph	Animal Pathogen-Undefined Saprotroph	Microfungus	-	Saprobic, found in a wide range of habitats and especially in aquatic systems. Some of the red yeasts in this family are widely encountered spoilage organisms and opportunistic human pathogens (Cannon & Kirk 2007)	Cannon PF, Kirk PM. 2007. Fungal Families of the World. CAB International, Cambridge
Basidiomycota	Wallemiomycetes	Wallemiales	Wallemiaceae	Wallemia	Wallemia sp	0.00180963	0.000180963	0.000361925	0.000180963	0.000361925	0.00271444	0.00126674	0.000180963	0.0014477	0.000180963	Saprotroph	Undefined Saprotroph	-	-	-	Tedersoo L, et al. 2014. Science 346:1256688 (doi:10.1126/science.1256688)
Ascomycota	Dothideomycetes	Pleosporales	Cucurbitariaceae	Pyrenochaetopsis	unclassified_g__Pyrenochaetopsis	0.00126674	0.000180963	0.000361925	0.000904814	0.000180963	0.00217155	0.00108578	0.000180963	0.00126674	0.000180963	Pathotroph-Saprotroph-Symbiotroph	Endophyte-Lichen Parasite-Undefined Saprotroph	Microfungus	-	-	Tedersoo L, et al. 2014. Science 346:1256688; Massimo NC, et al. 2015. Microbial Ecology 70:61-76; Lawrey JD, Diederich P. 2016. URL: http://www.lichenicolous.net [24 May 2017]
Ascomycota	Saccharomycetes	Saccharomycetales	Saccharomycetaceae	Saccharomyces	Saccharomyces sp	0	0	0	0	0	0.00452407	0.00180963	0	0.000542888	0	Saprotroph	Undefined Saprotroph	Yeast	-	-	James TY, et al. 2006. Nature 443:818-822
Basidiomycota	Tremellomycetes	Trichosporonales	Trichosporonaceae	Apiotrichum	Apiotrichum montevideense	0.000180963	0	0	0.00343829	0	0.000180963	0	0.000180963	0.00235252	0.000361925	Saprotroph	Soil Saprotroph	Microfungus	-	From forest soil (Calduch et al. 2002)	Calduch M, et al. 2002. Mycologia 94:355-361
Basidiomycota	Wallemiomycetes	Wallemiales	Wallemiaceae	Wallemia	Wallemia sp	0.000361925	0.000180963	0.000180963	0.000542888	0.000361925	0.00126674	0.000904814	0.000542888	0	0.000723851	Saprotroph	Undefined Saprotroph	-	-	-	Tedersoo L, et al. 2014. Science 346:1256688 (doi:10.1126/science.1256688)
Ascomycota	Eurotiomycetes	Eurotiales	Aspergillaceae	Aspergillus	Aspergillus penicillioides	0.0028954	0	0.000180963	0	0	0.00108578	0	0	0	0	Saprotroph	Undefined Saprotroph	Microfungus	-	-	Sterkenburg E, et al. 2015. New Phytologist 207:1145-1158
Ascomycota	Saccharomycetes	Saccharomycetales	Metschnikowiaceae	Kodamaea	Kodamaea ohmeri	0.000180963	0	0	0	0	0	0	0	0.000361925	0.00343829	Saprotroph	Undefined Saprotroph	Yeast	-	-	Sterkenburg E, et al. 2015. New Phytologist 207:1145-1158
Ascomycota	Dothideomycetes	Capnodiales	Cladosporiaceae	Cladosporium	Cladosporium halotolerans	0	0.000180963	0	0.000904814	0.00126674	0	0	0	0.00108578	0.000180963	Pathotroph-Saprotroph-Symbiotroph	Animal Pathogen-Endophyte-Lichen Parasite-Plant Pathogen-Wood Saprotroph	Microfungus	-	-	Seehann G, et al. 1975. List of Fungi in Soft-Rot Tissue Tests. Institute fur Holzbiologie und Holzschutz, Bundesforschungsanstalt fur Forst - und Holzwirtshaft, Hamburg - Lohbrugge, Germany; Lawrey JD, Diederich P. 2016. URL: http://www.lichenicolous.net [24 May 2017]; http://www.apsnet.org/publications/commonnames/Pages/default.aspx
Basidiomycota	Microbotryomycetes	Sporidiobolales	Sporidiobolaceae	Rhodotorula	Rhodotorula mucilaginosa	0.000180963	0	0	0	0.000542888	0	0.000180963	0.000180963	0.00199059	0	Pathotroph-Saprotroph	Animal Endosymbiont-Animal Pathogen-Endophyte-Plant Pathogen-Undefined Saprotroph	Yeast	-	Opportunistic human pathogen	http://www.cdc.gov
Ascomycota	Saccharomycetes	Saccharomycetales	Metschnikowiaceae	Clavispora	Clavispora opuntiae	0	0.00126674	0.00180963	0	0	0	0	0	0	0	Saprotroph	Undefined Saprotroph	Yeast	-	-	Sterkenburg E, et al. 2015. New Phytologist 207:1145-1158
Basidiomycota	Tremellomycetes	Tremellales	Bulleribasidiaceae	Hannaella	Hannaella sinensis	0.000180963	0	0.000180963	0.000542888	0	0.000180963	0.000723851	0.000180963	0.000542888	0.000180963	Pathotroph-Saprotroph-Symbiotroph	Fungal Parasite-Undefined Saprotroph	Tremelloid-Yeast	-	The order contains both teleomorphic and anamorphic species, most of the latter being yeasts	Sterkenburg E, et al. 2015. New Phytologist 207:1145-1158
Ascomycota	Eurotiomycetes	Eurotiales	unclassified_Eurotiales	unclassified_Eurotiales	unclassified_Eurotiales	0	0.000361925	0.000180963	0.000723851	0	0	0.000180963	0	0.00108578	0	Saprotroph	Undefined Saprotroph	Microfungus	-	-	Sterkenburg E, et al. 2015. New Phytologist 207:1145-1158
Ascomycota	Eurotiomycetes	Eurotiales	Aspergillaceae	Aspergillus	unclassified_g__Aspergillus	0.000542888	0.000180963	0.000723851	0	0	0.000361925	0	0	0.000542888	0	Saprotroph	Undefined Saprotroph	Microfungus	-	-	Sterkenburg E, et al. 2015. New Phytologist 207:1145-1158
Ascomycota	Sordariomycetes	Hypocreales	Bionectriaceae	Clonostachys	Clonostachys epichloe	0.000180963	0	0	0.000361925	0.000180963	0.000723851	0.000361925	0	0.000361925	0.000180963	Pathotroph	Plant Pathogen	-	-	-	Tedersoo L, et al. 2014. Science 346:1256688
Ascomycota	Saccharomycetes	Saccharomycetales	Saccharomycetales_fam_Incertae_sedis	Candida	Candida parapsilosis	0	0	0	0	0.000180963	0	0	0	0	0.00199059	Saprotroph	Undefined Saprotroph	Yeast	-	-	Sterkenburg E, et al. 2015. New Phytologist 207:1145-1158
Ascomycota	Eurotiomycetes	Eurotiales	Aspergillaceae	Aspergillus	unclassified_g__Aspergillus	0.000904814	0	0	0.000180963	0	0.000904814	0	0	0	0	Saprotroph	Undefined Saprotroph	Microfungus	-	-	Sterkenburg E, et al. 2015. New Phytologist 207:1145-1158
Ascomycota	Saccharomycetes	Saccharomycetales	Dipodascaceae	unclassified_Dipodascaceae	unclassified_Dipodascaceae	0	0.000361925	0.000180963	0.000542888	0	0	0	0	0.000542888	0.000361925	Saprotroph	Undefined Saprotroph	Yeast	-	-	Sterkenburg E, et al. 2015. New Phytologist 207:1145-1158
Ascomycota	Sordariomycetes	Hypocreales	Nectriaceae	Gibberella	Gibberella intricans	0	0.000180963	0.000180963	0	0.000361925	0	0.000542888	0.000542888	0.000180963	0	Pathotroph	Plant Pathogen	-	-	-	Tedersoo L, et al. 2014. Science 346:1256688
Ascomycota	Saccharomycetes	Saccharomycetales	Phaffomycetaceae	Wickerhamomyces	Wickerhamomyces anomalus	0	0.000180963	0.00108578	0.000180963	0.000180963	0	0.000180963	0	0	0.000180963	Saprotroph	Undefined Saprotroph	Yeast	-	-	Sterkenburg E, et al. 2015. New Phytologist 207:1145-1158
Basidiomycota	Tremellomycetes	Trichosporonales	Trichosporonaceae	Cutaneotrichosporon	Cutaneotrichosporon cutaneum	0	0.000180963	0	0.000542888	0	0	0	0	0.00126674	0	Pathotroph	Animal Pathogen	Yeast	-	Pathogenic to humans	Nath R, et al. 2018. Mycopathologia 183:585 (https://doi.org/10.1007/s11046-017-0231-8)
Ascomycota	Eurotiomycetes	Eurotiales	Aspergillaceae	Aspergillus	Aspergillus penicillioides	0	0	0	0.000180963	0	0.000180963	0	0	0.000723851	0.000723851	Saprotroph	Undefined Saprotroph	Microfungus	-	-	Sterkenburg E, et al. 2015. New Phytologist 207:1145-1158
Basidiomycota	Wallemiomycetes	Wallemiales	Wallemiaceae	Wallemia	Wallemia hederae	0.000180963	0	0	0.000180963	0	0.000542888	0.000180963	0	0	0	Saprotroph	Undefined Saprotroph	-	-	-	Tedersoo L, et al. 2014. Science 346:1256688 (doi:10.1126/science.1256688)
Basidiomycota	Wallemiomycetes	Wallemiales	Wallemiaceae	Wallemia	unclassified_g__Wallemia	0	0.000180963	0	0	0	0.000361925	0.000180963	0.000180963	0.000180963	0	Saprotroph	Undefined Saprotroph	-	-	-	Tedersoo L, et al. 2014. Science 346:1256688 (doi:10.1126/science.1256688)
Basidiomycota	Wallemiomycetes	Wallemiales	Wallemiaceae	Wallemia	unclassified_g__Wallemia	0	0	0	0	0	0.000542888	0.000180963	0.000180963	0	0.000180963	Saprotroph	Undefined Saprotroph	-	-	-	Tedersoo L, et al. 2014. Science 346:1256688 (doi:10.1126/science.1256688)
Basidiomycota	Wallemiomycetes	Wallemiales	Wallemiaceae	Wallemia	unclassified_g__Wallemia	0	0	0	0	0	0.000723851	0.000361925	0	0	0	Saprotroph	Undefined Saprotroph	-	-	-	Tedersoo L, et al. 2014. Science 346:1256688 (doi:10.1126/science.1256688)
Ascomycota	Eurotiomycetes	Eurotiales	Aspergillaceae	Aspergillus	Aspergillus penicillioides	0.000361925	0	0	0	0	0.000180963	0.000180963	0	0	0	Saprotroph	Undefined Saprotroph	Microfungus	-	-	Sterkenburg E, et al. 2015. New Phytologist 207:1145-1158
Ascomycota	Eurotiomycetes	Eurotiales	Aspergillaceae	Aspergillus	unclassified_g__Aspergillus	0	0.000180963	0.000361925	0	0	0.000180963	0	0	0	0	Saprotroph	Undefined Saprotroph	Microfungus	-	-	Sterkenburg E, et al. 2015. New Phytologist 207:1145-1158
Basidiomycota	Tremellomycetes	Filobasidiales	Filobasidiaceae	Naganishia	unclassified_g__Naganishia	0	0	0	0.000180963	0	0	0	0	0.000361925	0	Unknown	Unknown	-	-	Unassigned	-
Note: CKGP: the control group; LPGP: the inoculation group. The numbers following the CKGP and LPGP indicate the sampling time (day).
